# Supplementary material for: LaSrCoFeO5, LaSrCoFeO5F and LaSrCoFeO5.5: new La–Sr–Co–Fe perovskites
Source: Royal Society of Chemistry journal article supplement (doi:10.1039/b927141d), 2010-01-01
Supplement: b927141d.pdf [file b927141d.pdf]

# LaSrCoFeO<sub>5</sub>, LaSrCoFeO<sub>5</sub>F and LaSrCoFeO<sub>5.5</sub>: New La-Sr-Co-Fe perovskites

H. El Shinawi<sup>a</sup>, J. F. Marco<sup>b</sup>, F. J. Berry<sup>a,c</sup> and C. Greaves<sup>a</sup>

<sup>a</sup> School of Chemistry, University of Birmingham, Birmingham B15 2TT, UK

<sup>b</sup> Instituto de Química-Física "Rocasolano", CSIC, Serrano 119, 28006 Madrid, Spain

<sup>c</sup> Department of Chemistry, The Open University, Milton Keynes MK7 6AA, UK

## Supporting Information

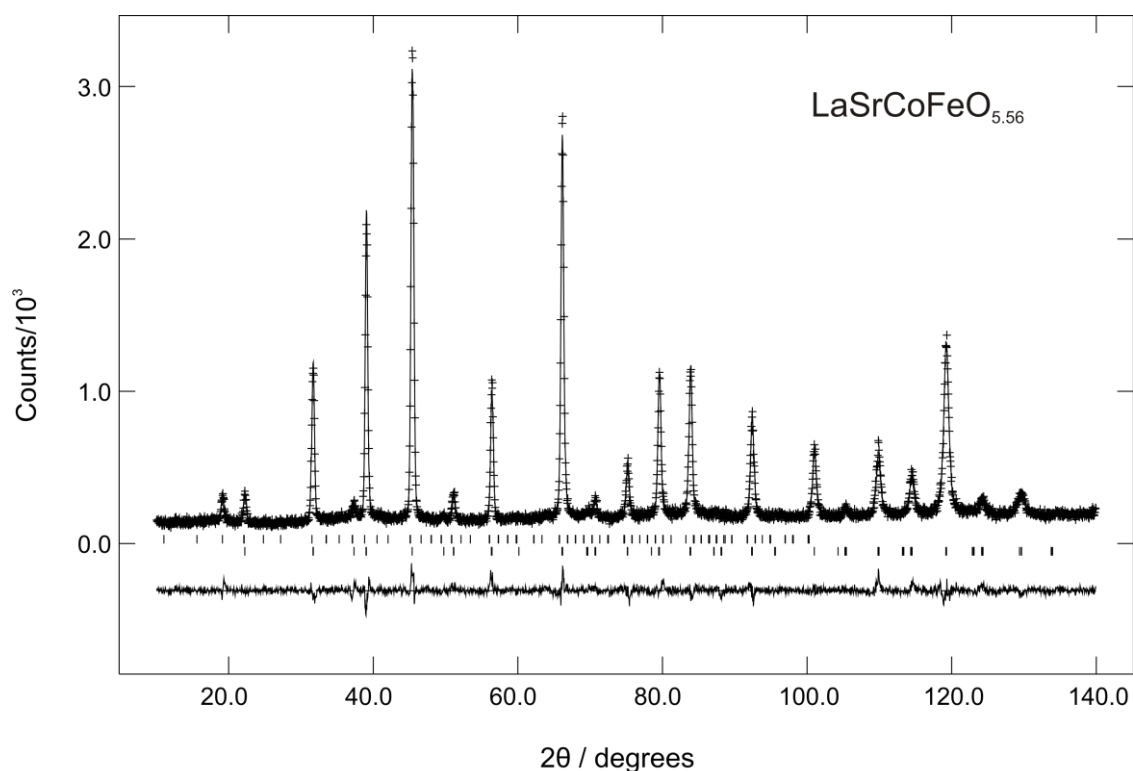

**Figure S1.** Observed (+), calculated and difference profiles (solid lines) for NPD data collected from the quenched phase (LaSrCoFeO<sub>5.56</sub>) at room temperature, showing nuclear (lower tick marks) and magnetic (upper tick marks) reflections;  $\lambda=1.4942$  Å.

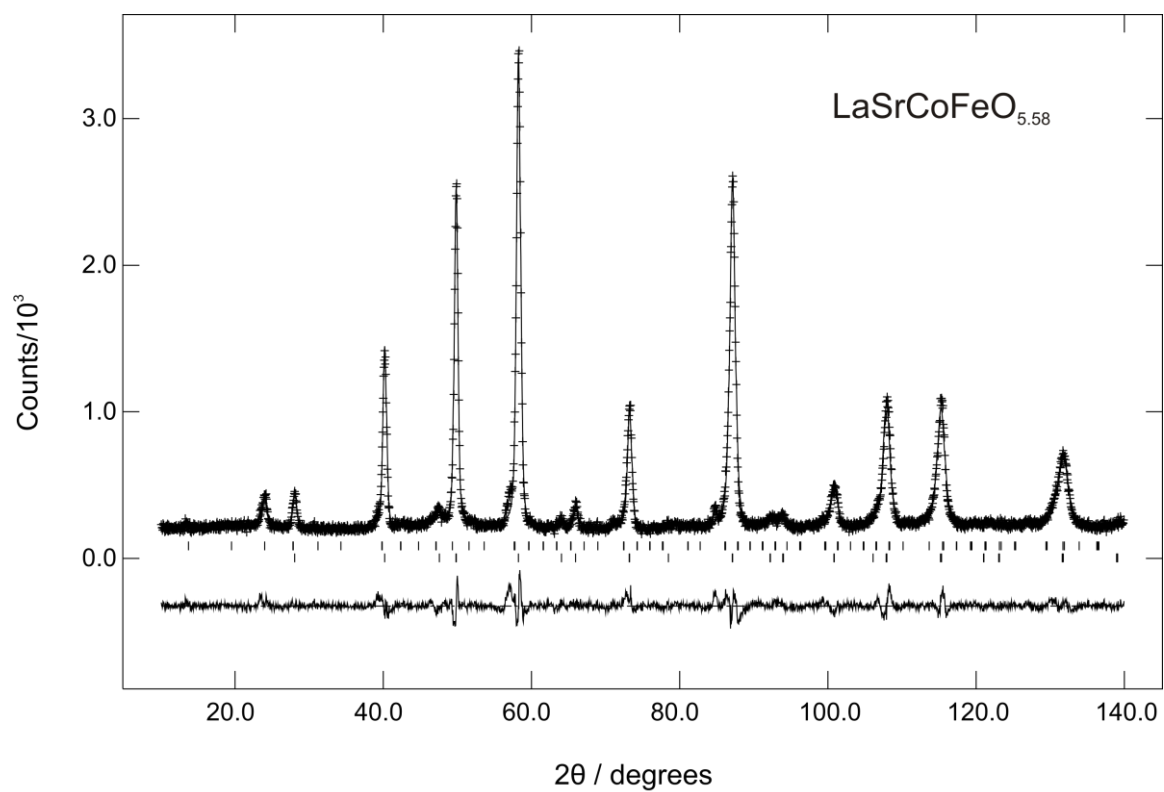

**Figure S2.** Observed (+), calculated and difference profiles (solid lines) for NPD data collected from the room temperature air oxidized phase ( $\text{LaSrCoFeO}_{5.58}$ ) at room temperature, showing nuclear (lower tick marks) and magnetic (upper tick marks) reflections;  $\lambda=1.8852 \text{ \AA}$ .
